# Supplementary material
Source: HighWire-hosted journal article supplement (https://gut.bmj.com/content/gutjnl-2022-327561)
Supplement: inline-supplementary-material-5 [file inline-supplementary-material-5.pdf]

Supplementary Table S3 The indicators of lymphocytes were measured in different time points during the SARS-CoV-2 vaccination process from the healthy volunteers using flow cytometry.

| Sample ID          | The measurement of lymphocytes before vaccination |          |         |            |           |          |          |       |        |          | The measurement of lymphocytes at 2 weeks after first dose |            |          |         |          |         |         |         |          |            | The measurement of lymphocytes at 1 week after second dose |        |          |         |       |         |          |            |          |        | The measurement of lymphocytes at 2 weeks after second dose |          |     |        |        |            |          |      |          |     |
|--------------------|---------------------------------------------------|----------|---------|------------|-----------|----------|----------|-------|--------|----------|------------------------------------------------------------|------------|----------|---------|----------|---------|---------|---------|----------|------------|------------------------------------------------------------|--------|----------|---------|-------|---------|----------|------------|----------|--------|-------------------------------------------------------------|----------|-----|--------|--------|------------|----------|------|----------|-----|
|                    | CD3                                               | CD3CD8   | CD3CD4  | CD3CD4 CD8 | CD16CD56  | CD19     | 4/8Ratio | Lym   | CD3    | CD3CD8   | CD3CD4                                                     | CD3CD4 CD8 | CD16CD56 | CD19    | 4/8Ratio | Lym     | CD3     | CD3CD8  | CD3CD4   | CD3CD4 CD8 | CD16CD56                                                   | CD19   | 4/8Ratio | Lym     | CD3   | CD3CD8  | CD3CD4   | CD3CD4 CD8 | CD16CD56 | CD19   | 4/8Ratio                                                    | Lym      | CD3 | CD3CD8 | CD3CD4 | CD3CD4 CD8 | CD16CD56 | CD19 | 4/8Ratio | Lym |
| F01                | 85.03                                             | 38.25    | 44.13   | 1.16       | 4.68      | 9.31     | 1.15     | 4403  | 82.56  | 37.01    | 43.04                                                      | 1.2        | 6.95     | 9.6     | 1.16     | 6576    | 83.91   | 35.91   | 44.88    | 0.67       | 5.48                                                       | 9.06   | 1.25     | 5825    | 85.45 | 35.42   | 47.7     | 0.95       | 3.89     | 8.97   | 1.35                                                        | 5706     |     |        |        |            |          |      |          |     |
| F02                | 58.91                                             | 16.27    | 39.34   | 0.62       | 26.68     | 12.97    | 2.42     | 5668  | 65.82  | 16.51    | 45.66                                                      | 0.28       | 17.73    | 15.26   | 2.77     | 5725    | 66.3    | 15.27   | 47.41    | 0.36       | 17.42                                                      | 15.12  | 3.11     | 6066    | 64.96 | 15.98   | 45.57    | 0.29       | 16.04    | 16.5   | 2.85                                                        | 7480     |     |        |        |            |          |      |          |     |
| F03                | 75.53                                             | 34.47    | 37.36   | 2.5        | 14.01     | 9.8      | 1.08     | 5530  | 77.58  | 28.36    | 43.76                                                      | 0.66       | 8.24     | 13.09   | 1.54     | 6806    | 75.8    | 31.9    | 37.55    | 1.27       | 10.66                                                      | 12.9   | 1.18     | 4335    | 71.45 | 31.82   | 34.78    | 1.88       | 16.69    | 10.05  | 1.09                                                        | 4638     |     |        |        |            |          |      |          |     |
| F04                | 71.22                                             | 28.93    | 41.51   | 1.69       | 17.79     | 9.9      | 1.43     | 3958  | 68.76  | 30.7     | 38.86                                                      | 1.7        | 22       | 8.48    | 1.2      | 4069    | 71.08   | 25.45   | 44.92    | 1.59       | 16.92                                                      | 9.72   | 1.76     | 3210    | 71.62 | 25.94   | 44.56    | 1.4        | 15.21    | 11.08  | 1.72                                                        | 4845     |     |        |        |            |          |      |          |     |
| F05                | 71.75                                             | 23.99    | 38.45   | 0.74       | 17.39     | 10.18    | 1.6      | 3243  | 75     | 25.6     | 40.55                                                      | 0.52       | 14.95    | 9.41    | 1.57     | 6900    | 76.4    | 24.26   | 45.54    | 0.95       | 12.09                                                      | 10.76  | 1.88     | 3911    | 76.4  | 24.26   | 45.54    | 0.95       | 9.74     | 12.82  | 1.93                                                        | 6583     |     |        |        |            |          |      |          |     |
| F06                | 71.18                                             | 33.56    | 35.81   | 1.18       | 13.41     | 13.7     | 1.07     | 5233  | 73.92  | 33.52    | 38.41                                                      | 0.9        | 10.57    | 14.82   | 1.15     | 5126    | 72.12   | 33.54   | 37.35    | 1.12       | 9.31                                                       | 16.34  | 1.11     | 4627    | 71.04 | 31.71   | 37.12    | 0.88       | 10.48    | 16.43  | 1.17                                                        | 5477     |     |        |        |            |          |      |          |     |
| F07                | 58.74                                             | 22.67    | 32.52   | 0.3        | 30.09     | 9.87     | 1.43     | 4001  | 59.01  | 22.56    | 31.46                                                      | 0.13       | 29.55    | 10.77   | 1.39     | 6065    | 69.71   | 25.96   | 38.99    | 0.17       | 16.22                                                      | 11.66  | 1.5      | 7091    | 76.69 | 32.3    | 49.47    | 0          | 16.66    | 12.38  | 1.53                                                        | 5295     |     |        |        |            |          |      |          |     |
| F08                | 66.4                                              | 21.8     | 42.25   | 0.63       | 24.02     | 8.55     | 1.94     | 4738  | 74.48  | 25.21    | 45.87                                                      | 0.52       | 16.8     | 8.1     | 1.82     | 6680    | 70.1    | 22.5    | 44.78    | 0.55       | 17.39                                                      | 9.76   | 1.99     | 3966    | 70.42 | 24.14   | 43.11    | 0.64       | 15.42    | 11.41  | 1.79                                                        | 5767     |     |        |        |            |          |      |          |     |
| F09                | 72.67                                             | 26.74    | 41.62   | 0.45       | 14.64     | 12.19    | 1.56     | 4618  | 73.91  | 28.34    | 40.74                                                      | 0.31       | 11.91    | 13.56   | 1.44     | 5979    | 74.1    | 24.43   | 46.72    | 0.44       | 8.42                                                       | 14.61  | 1.91     | 4347    | 72.72 | 26.53   | 43.14    | 0.16       | 8.07     | 17.83  | 1.83                                                        | 6762     |     |        |        |            |          |      |          |     |
| F10                | 63.26                                             | 19.01    | 38.79   | 0.56       | 26.71     | 7.7      | 2.04     | 4298  | 66.72  | 19.22    | 41.59                                                      | 0.57       | 24.62    | 8.12    | 2.16     | 5468    | 73.45   | 21.36   | 49.25    | 0.88       | 9.89                                                       | 13.03  | 2.31     | 4258    | 71.1  | 21.84   | 44.41    | 0.39       | 13.86    | 9.65   | 2.03                                                        | 5325     |     |        |        |            |          |      |          |     |
| F11                | 71.97                                             | 28.38    | 40.53   | 0.24       | 10.81     | 16.75    | 1.43     | 4246  | 76.91  | 25.93    | 47.09                                                      | 0.25       | 4.26     | 17.97   | 1.82     | 6744    | 71.56   | 27.45   | 40.56    | 0.38       | 10.65                                                      | 16.73  | 1.48     | 4423    | 74.32 | 27.04   | 44.56    | 0.23       | 6.96     | 16.06  | 1.65                                                        | 7458     |     |        |        |            |          |      |          |     |
| F12                | 76.88                                             | 36.39    | 33.47   | 0.41       | 11.43     | 10.59    | 0.92     | 3702  | 82.45  | 37.45    | 38.76                                                      | 0.73       | 8.32     | 6.7     | 1.04     | 5962    | 75.96   | 34.73   | 35.49    | 1.15       | 7.07                                                       | 11.57  | 1.02     | 4164    | 78.4  | 34.94   | 38.11    | 0.52       | 6.93     | 12.92  | 1.08                                                        | 6772     |     |        |        |            |          |      |          |     |
| F13                | 63.12                                             | 24.91    | 33.79   | 0.55       | 29.53     | 6.75     | 1.36     | 3850  | 66.11  | 22.69    | 38.17                                                      | 0.58       | 22.76    | 9.62    | 1.68     | 6966    | 68.35   | 26.08   | 36.13    | 0.51       | 13.19                                                      | 11.78  | 1.39     | 4329    | 72.24 | 22.31   | 44.14    | 0.34       | 14.2     | 10.11  | 1.98                                                        | 6429     |     |        |        |            |          |      |          |     |
| F14                | 61.1                                              | 26.64    | 28.38   | 0.3        | 33.28     | 4.67     | 1.07     | 5740  | 69.59  | 26.01    | 37.45                                                      | 0.41       | 23.45    | 6.07    | 1.44     | 8120    | 76.65   | 28.48   | 42.91    | 0.41       | 14.29                                                      | 7.71   | 1.51     | 6591    | 79.92 | 32.71   | 50.85    | 0.2        | 19.88    | 7.32   | 1.55                                                        | 5246     |     |        |        |            |          |      |          |     |
| F15                | 70.12                                             | 29.18    | 36.75   | 0.73       | 18.79     | 10.01    | 1.26     | 3976  | 70.58  | 27.44    | 38.05                                                      | 0.41       | 16.09    | 11.35   | 1.39     | 6098    | 69.92   | 28.99   | 38.24    | 1.29       | 15.47                                                      | 9.88   | 1.32     | 5037    | 69.52 | 29.89   | 36.36    | 0.4        | 14.28    | 14.16  | 1.22                                                        | 5762     |     |        |        |            |          |      |          |     |
| M01                | 77.86                                             | 29.96    | 41.09   | 0.11       | 15.34     | 5.86     | 1.37     | 4459  | 81.76  | 28.51    | 47.15                                                      | 0.14       | 9.46     | 7.29    | 1.65     | 6490    | 78.72   | 27.13   | 46.12    | 0.52       | 11.4                                                       | 9.43   | 1.7      | 4412    | 82.33 | 28.04   | 49.57    | 0.2        | 7.59     | 8.34   | 1.77                                                        | 6548     |     |        |        |            |          |      |          |     |
| M02                | 66.29                                             | 27.43    | 36.11   | 0.84       | 17.83     | 15.31    | 1.32     | 2501  | 59.72  | 25.39    | 30.67                                                      | 0.3        | 23.28    | 15.36   | 1.21     | 6293    | 68.35   | 26.08   | 36.13    | 0.51       | 13.19                                                      | 11.78  | 1.39     | 4329    | 63.12 | 26.77   | 33.17    | 0.33       | 14.73    | 20.62  | 1.24                                                        | 6747     |     |        |        |            |          |      |          |     |
| M03                | 48.49                                             | 24.29    | 21.26   | 0.67       | 41.86     | 7.52     | 0.88     | 3273  | 44.47  | 21.12    | 20.18                                                      | 0.51       | 48.02    | 6.61    | 0.96     | 4540    | 51.96   | 24.5    | 24.15    | 0.54       | 38.53                                                      | 7.63   | 0.99     | 5739    | 48.5  | 23.81   | 21.31    | 0.41       | 41.83    | 7.57   | 0.89                                                        | 4913     |     |        |        |            |          |      |          |     |
| M04                | 67.83                                             | 32.13    | 27.6    | 0.65       | 20.33     | 9.82     | 0.86     | 2827  | 67.05  | 30.4     | 28.77                                                      | 0.54       | 22.15    | 9.98    | 0.95     | 4049    | 70.58   | 33.83   | 29.88    | 0.62       | 15.11                                                      | 13.15  | 0.88     | 4327    | 68.91 | 30.82   | 30.88    | 0.41       | 18.35    | 11.36  | 1                                                           | 5140     |     |        |        |            |          |      |          |     |
| M05                | 75.8                                              | 30.9     | 39.76   | 0.3        | 14.55     | 8.45     | 1.29     | 3951  | 79.86  | 25.02    | 48.87                                                      | 0.2        | 7.29     | 9.67    | 1.95     | 4500    | 81.38   | 23.04   | 52.15    | 0.31       | 4.65                                                       | 11.33  | 2.96     | 4140    | 80.7  | 23.35   | 52.14    | 0.37       | 5.09     | 10.81  | 2.23                                                        | 5362     |     |        |        |            |          |      |          |     |
| M06                | 68.19                                             | 31.14    | 32.72   | 0.49       | 19.03     | 12.09    | 1.05     | 3863  | 64.03  | 29.6     | 29.6                                                       | 0.19       | 23.31    | 10.8    | 1        | 4835    | 79.28   | 32.27   | 41.09    | 0.55       | 18.02                                                      | 11.53  | 1.27     | 4025    | 65.73 | 29.54   | 31.34    | 0.2        | 18.13    | 13.75  | 1.06                                                        | 4908     |     |        |        |            |          |      |          |     |
| M07                | 63.2                                              | 26.74    | 33.21   | 0.48       | 21.87     | 13.01    | 1.24     | 5195  | 67.5   | 26.84    | 38.47                                                      | 0.47       | 15.71    | 16.16   | 1.43     | 5742    | 68.22   | 25.75   | 35.76    | 0.58       | 16.18                                                      | 15.39  | 1.39     | 5022    | 70.1  | 22.33   | 44.78    | 0.55       | 16.73    | 9.76   | 2.01                                                        | 3986     |     |        |        |            |          |      |          |     |
| M08                | 57.27                                             | 23.78    | 30.47   | 0.51       | 21.61     | 10.57    | 1.28     | 4730  | 61.94  | 24.87    | 32.68                                                      | 0.34       | 17.55    | 12.62   | 1.35     | 6103    | 60.36   | 24.53   | 32.25    | 0.27       | 19.27                                                      | 18.92  | 1.31     | 4142    | 70.5  | 28.57   | 38.36    | 0.63       | 9.34     | 15.2   | 1.36                                                        | 7145     |     |        |        |            |          |      |          |     |
| M09                | 67.54                                             | 26.54    | 37.52   | 0.28       | 14.96     | 15.44    | 1.41     | 3937  | 61.52  | 23.92    | 34.6                                                       | 0.52       | 21.2     | 14.98   | 1.45     | 4821    | 67.24   | 25.58   | 39.47    | 0.51       | 13.57                                                      | 17.3   | 1.54     | 4930    | 63.64 | 23.86   | 36.43    | 0.24       | 15.05    | 18.34  | 1.53                                                        | 5528     |     |        |        |            |          |      |          |     |
| M10                | 63.97                                             | 23.28    | 35.56   | 0.52       | 25.92     | 9.3      | 1.53     | 3819  | 66.24  | 24.2     | 36.41                                                      | 0.28       | 21.77    | 10.39   | 1.5      | 5388    | 63.95   | 22.63   | 35.4     | 0.39       | 22.74                                                      | 11.74  | 1.56     | 5334    | 74.05 | 33.78   | 48.08    | 0.22       | 17.94    | 11.28  | 1.42                                                        | 5331     |     |        |        |            |          |      |          |     |
| M11                | 76.28                                             | 31.05    | 36.98   | 0.28       | 12.26     | 11.11    | 1.19     | 3221  | 76.74  | 31.52    | 38.57                                                      | 0.22       | 12.15    | 10.37   | 1.22     | 4493    | 79.28   | 32.27   | 41.09    | 0.55       | 8.62                                                       | 11.53  | 1.27     | 4025    | 75.75 | 31.08   | 37.87    | 0.48       | 9.63     | 13.34  | 1.22                                                        | 5855     |     |        |        |            |          |      |          |     |
| M12                | 71.02                                             | 32.08    | 36.09   | 0.54       | 14.64     | 13.22    | 1.13     | 4810  | 67.3   | 28.96    | 34.75                                                      | 0.41       | 18.27    | 11.79   | 1.2      | 5665    | 71.17   | 31.61   | 35.72    | 1.15       | 10.98                                                      | 16     | 1.13     | 4963    | 69.2  | 28.68   | 35.96    | 0.23       | 14.99    | 13.34  | 1.21                                                        | 6910     |     |        |        |            |          |      |          |     |
| M13                | 49.62                                             | 24.34    | 22.21   | 0.23       | 32.91     | 15.79    | 0.91     | 4363  | 52.82  | 24.95    | 25.17                                                      | 0.32       | 30.9     | 13.47   | 1.01     | 5559    | 57.52   | 27.02   | 27.79    | 0.36       | 22.08                                                      | 18.24  | 1.03     | 6196    | 50.46 | 22.37   | 25.39    | 0.21       | 27.85    | 18.92  | 1.14                                                        | 6586     |     |        |        |            |          |      |          |     |
| M14                | 55.75                                             | 28.37    | 24.68   | 0.41       | 26.39     | 17.31    | 0.87     | 4194  | 52.01  | 27.49    | 22.06                                                      | 0.5        | 31.48    | 16.75   | 0.8      | 6370    | 56.4    | 28.28   | 24.8     | 0.41       | 24.31                                                      | 17.99  | 0.88     | 5665    | 55.76 | 28.05   | 24.6     | 0.57       | 26.56    | 16.08  | 0.88                                                        | 6617     |     |        |        |            |          |      |          |     |
| M15                | 45.71                                             | 14.46    | 28.79   | 0.14       | 41.67     | 10.13    | 1.99     | 4946  | 51.47  | 14.69    | 34.17                                                      | 0.18       | 35.29    | 11.42   | 2.33     | 5543    | 56.57   | 16.82   | 37.53    | 0.25       | 30.2                                                       | 12.31  | 2.23     | 5963    | 50.46 | 16.03   | 31.93    | 0.23       | 37.25    | 11.14  | 1.99                                                        | 6288     |     |        |        |            |          |      |          |     |
| Mean               | 66.42333                                          | 27.256   | 34.9583 | 0.617      | 21.14767  | 10.92967 | 1.396    | 4236  | 67.932 | 26.47433 | 37.0187                                                    | 0.476333   | 19.201   | 11.3863 | 1.45267  | 5737.53 | 70.233  | 26.9217 | 39.00167 | 0.642      | 15.1                                                       | 12.81  | 1.51833  | 4844.4  | 69.79 | 27.12   | 39.689   | 0.472667   | 15.64567 | 12.921 | 1.51767                                                     | 5913.633 |     |        |        |            |          |      |          |     |
| Standard deviation | 9.039099                                          | 5.379678 | 5.81577 | 0.47884    | 8.8787076 | 3.111263 | 0.368254 | 798.7 | 9.5627 | 4.968588 | 7.09782                                                    | 0.322382   | 9.455711 | 3.0402  | 0.430776 | 924.261 | 7.68163 | 4.8321  | 6.778944 | 0.355053   | 7.10977                                                    | 3.0663 | 0.48851  | 904.229 | 8.926 | 4.95462 | 7.948821 | 0.380184   | 8.426919 | 3.4313 | 0.44435                                                     | 876.4852 |     |        |        |            |          |      |          |     |
