# Supplementary material
Source: HighWire-hosted journal article supplement (https://gut.bmj.com/content/gutjnl-2022-327561)
Supplement: inline-supplementary-material-10 [file inline-supplementary-material-10.pdf]

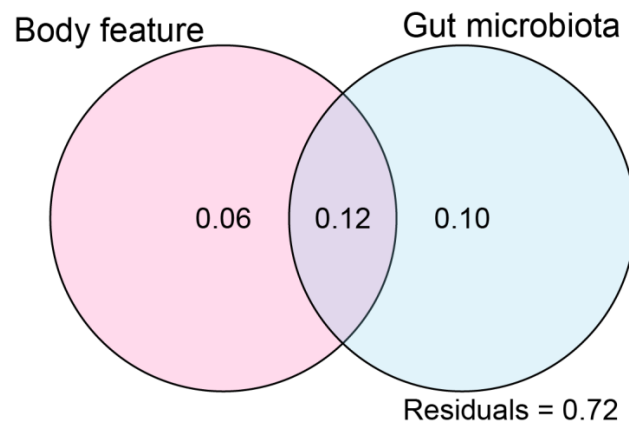

**Supplementary Figure S4. Effects of gut microbiota, body features, and their interactions on the production of SARS-CoV-2 antibodies.**
